# Supplementary material
Source: PubMed Central journal article supplement (PMC6556608)
Supplement: ajcr0009-0975-f7.pdf [file ajcr0009-0975-f7.pdf]

HVEM expression is an adverse predictor of ccRCC

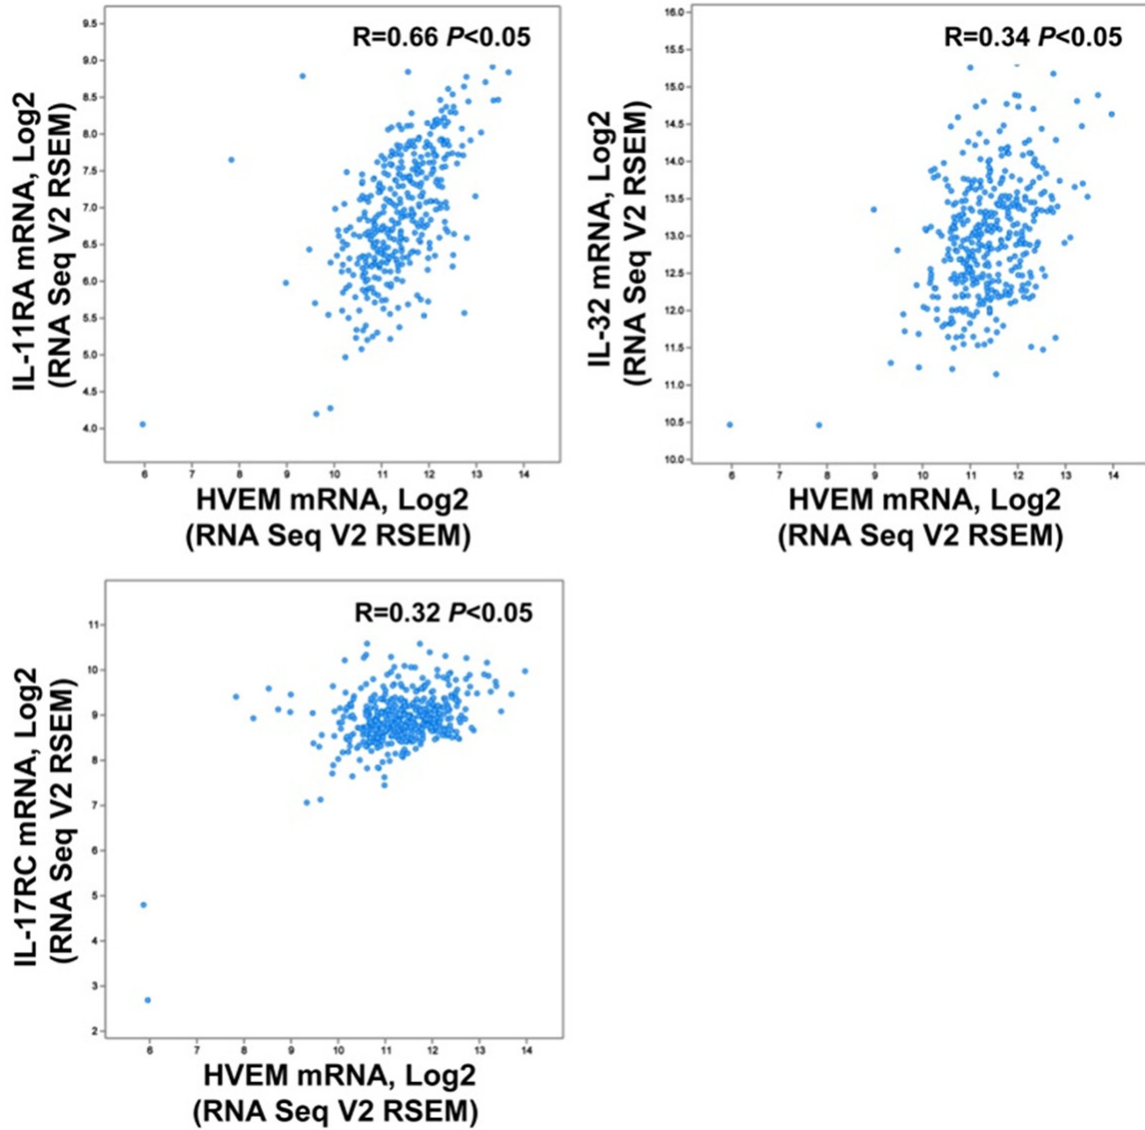

**Figure S1.** Correlation between mRNA levels encoding HVEM and tumor-promoting factors in ccRCC patients. Correlations between HVEM mRNA and IL-11RA, IL-32, and IL-17RC mRNAs were analyzed by the Pearson test. Data of these genes were obtained from the 2013 TCGA database.  $R$  = Pearson correlation coefficient.  $P < 0.05$  was regarded as statistically significant.
